# Supplementary material for: Vascular Endothelial Growth Factor–Mediated Islet Hypervascularization and Inflammation Contribute to Progressive Reduction of β-Cell Mass
Source: Oxford University Press journal article supplement (doi:10.2337/db12-0134), 2012-09-07

SUPPLEMENTARY DATA

**Supplementary Figure 1.** High fat diet (HFD) fed mice developed insulin resistance. Insulin sensitivity was determined after an intraperitoneal injection of insulin (0.75 units/kg body weigh). Results are calculated as the percentage of initial blood glucose levels.

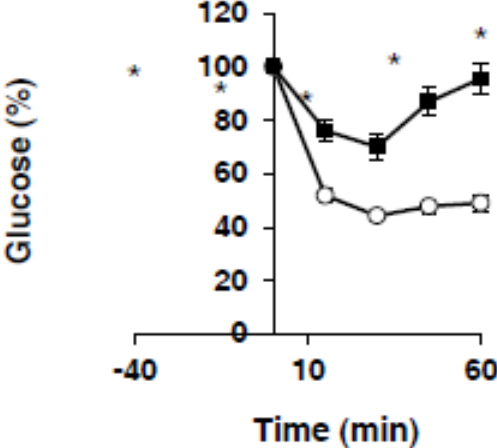

## SUPPLEMENTARY DATA

**Supplementary Figure 2.** Forty days after AAV-VEGF administration, islets showed hypervascularization and inflammation. *Upper panel*, islets from AAV-VEGF-treated mice displayed irregular vessels with thicker basal membrane as shown by collagen IV immunostaining (red). *Middle panel*, double immunohistochemical analysis of insulin (green) and glucagon (red) expression revealed disorganized islets with altered  $\alpha$  and  $\beta$ -cell distribution. *Lower panel*, infiltrating macrophages were abundant in islets from AAV-VEGF treated animals as evidenced by Mac-2 immunostaining. Scale bars, 100  $\mu$ m.

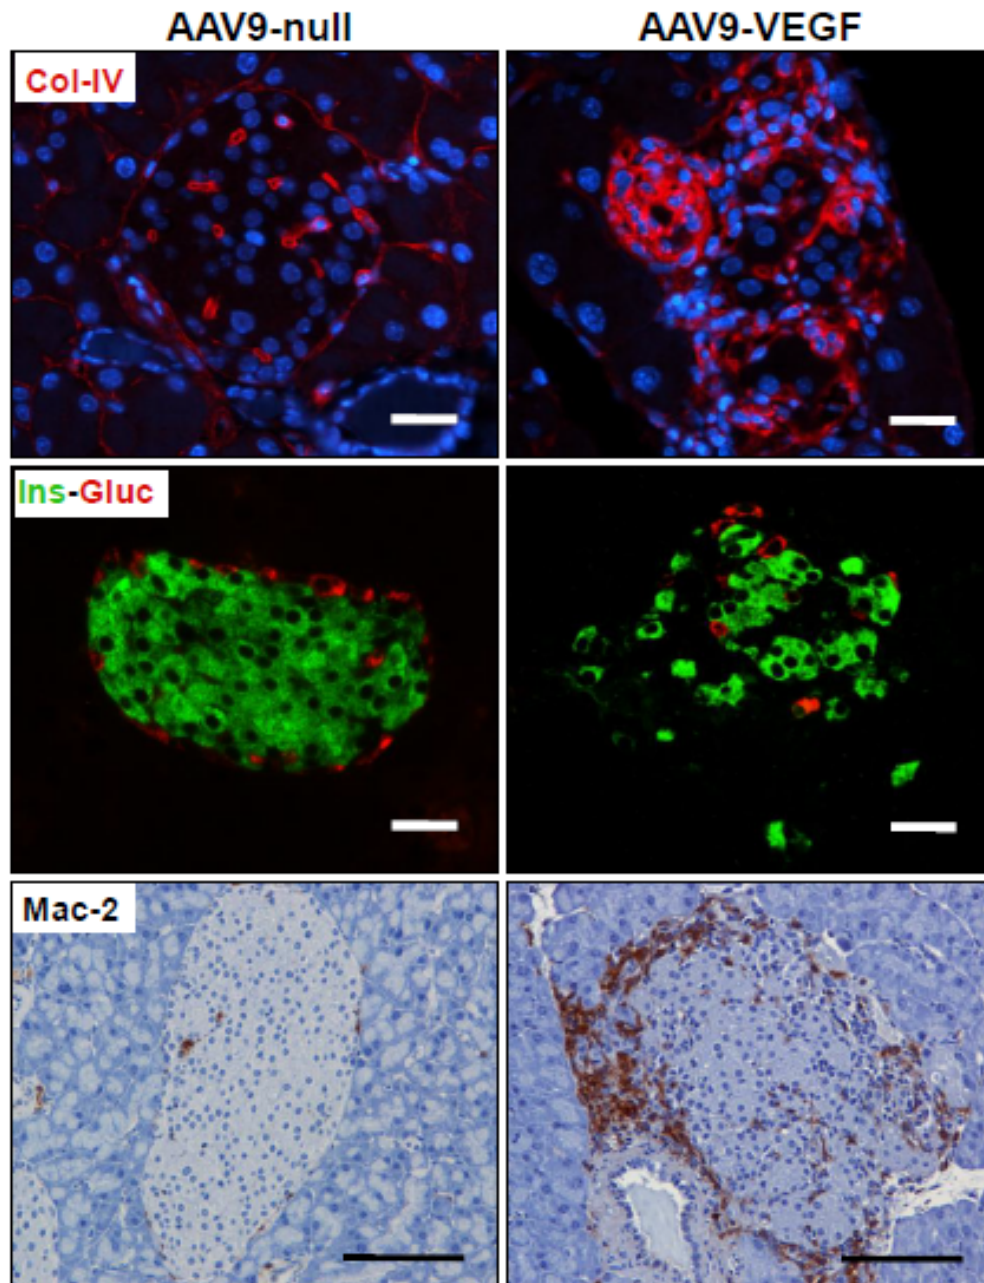

Supplement: db120134supplementarydata.pdf [file db120134supplementarydata.pdf]
